# Supplementary material for: Novel Rubber Composites Based on Copper Particles, Multi-Wall Carbon Nanotubes and Their Hybrid for Stretchable Devices
Source: MDPI journal article supplement (doi:10.3390/polym14183744), 2022-09-07
Supplement: s1 [file s1]

# Supporting Information: Novel Rubber Composites Based on Copper Particles, Multi-Wall Carbon Nanotubes and Their Hybrid for Stretchable Devices

Vineet Kumar, Siraj Azam, Md. Najib Alam, Won-Beom Hong, Sang-Shin Park

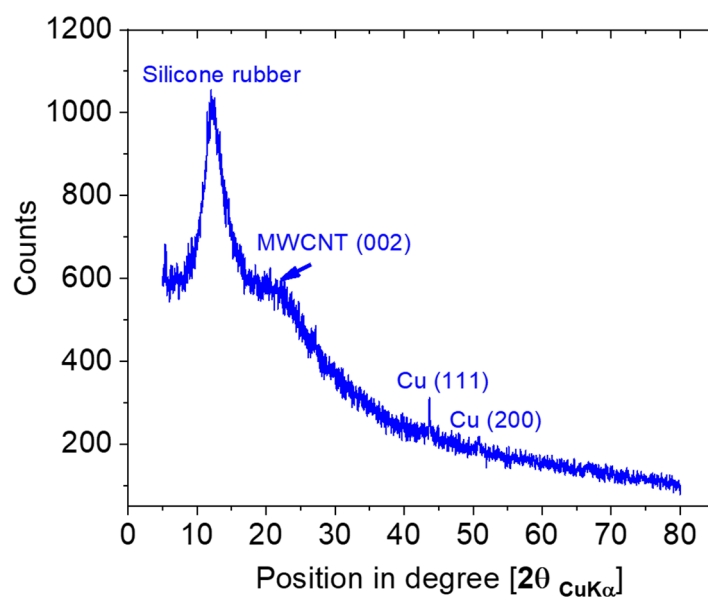

**Figure S1.** XRD of the hybrid composite containing copper and MWCNT particles.
